# Supplementary material for: Hydrogen sulfide treatment at the late growth stage of Saccharomyces cerevisiae extends chronological lifespan
Source: publisher site journal article supplement (doi:10.18632/aging.202738), 2021-03-19
Supplement: Supplementary file [file aging-v13i7-202738-supplementary-material-SD9.pdf]

## SUPPLEMENTARY TABLES

**Supplementary Table 8. Yeast strains.**

| Strain  | Genotype                                               | Source                                |
|---------|--------------------------------------------------------|---------------------------------------|
| BY4742  | <i>MATa his3-Δ1 leu2-Δ0 ura3-Δ0 lys2-Δ0</i>            | Lab stock                             |
| BY4741  | <i>MATa his3-Δ1 leu2-Δ0 ura3-Δ0 met15-Δ0</i>           | Lab stock                             |
| YMR104C | <i>MATa ypk2::KAN his3-Δ1 leu2-Δ0 ura3-Δ0 met15-Δ0</i> | Saccharomyces Genome Deletion Project |
| RCD490  | <i>MATa ypk2::KAN his3-Δ1 leu2-Δ0 ura3-Δ0 lys2-Δ0</i>  | Gift (Dr. Robert Dickson)             |

**Supplementary Table 9. Composition of SDC.**

| Component                                       | Concentration | Component | Concentration   |
|-------------------------------------------------|---------------|-----------|-----------------|
| YNB                                             | 1.8 g/L       | Trp       | 80 mg/L         |
| NaH <sub>2</sub> PO <sub>4</sub>                | 1.82 g/L      | Glu       | 100 mg/L        |
| (NH <sub>4</sub> ) <sub>2</sub> SO <sub>4</sub> | 5.0 g/L       | Arg       | 40 mg/L         |
| Tyr                                             | 40 mg/L       | Met       | 80 mg/L         |
| Adenine                                         | 80 mg/L       | Ile       | 60 mg/L         |
| Leu                                             | 120 mg/L      | Val       | 150 mg/L        |
| Asp                                             | 100 mg/L      | Phe       | 60 mg/L         |
| Ser                                             | 400 mg/L      | Lys       | 60 mg/L         |
| Thr                                             | 200 mg/L      | His       | 80 mg/L         |
| Ura                                             | 40 mg/L       | D-glucose | 20 g/L or 5 g/L |

**Supplementary Table 10. RT-qPCR primers.**

|          |                      |
|----------|----------------------|
| ACT1-F   | CGTTCCAATTTACGCTGGTT |
| ACT1-R   | AGCGGTTTGCATTTCTTGTT |
| Hsp104-F | GGCCATCAAGCAACAAGCTC |
| Hsp104-R | GCGGTCTTACCGATACCTGG |
| Hsp78-F  | CGCGCGACGGTAAATTAGAC |
| Hsp78-R  | GCGCCAGCAATCAAAGATCC |
| YPK2-F   | TGAGATGATGACAGGGCTGC |
| YPK2-R   | CTGTACCGTTAACGCCGAGT |
| GPX2-F   | TAATGTTGCCTCCAAGTGCG |
| GPX2-R   | GGTTCCTGCTTCCCGAACTG |
